# Supplementary material
Source: PubMed Central journal article supplement (PMC5683906)
Supplement: NIHMS871993-supplement-supplement_1.pdf [file NIHMS871993-supplement-supplement_1.pdf]

Supplemental Table  
ICD9 and respective diagnoses

| <b>Condition in study</b>                   | <b>ICD-9 used</b>                                                                                                                                                                                                                                                                                                                                                                                                                                                                                                                                                                                                                                                                                                                                                                                                                                                                                                                                                                                                                                                                                                                                     |
|---------------------------------------------|-------------------------------------------------------------------------------------------------------------------------------------------------------------------------------------------------------------------------------------------------------------------------------------------------------------------------------------------------------------------------------------------------------------------------------------------------------------------------------------------------------------------------------------------------------------------------------------------------------------------------------------------------------------------------------------------------------------------------------------------------------------------------------------------------------------------------------------------------------------------------------------------------------------------------------------------------------------------------------------------------------------------------------------------------------------------------------------------------------------------------------------------------------|
| <b>Stroke</b>                               | 434 Occlusion of cerebral arteries<br>434.0 Cerebral thrombosis<br>434.00 Cerebral thrombosis without mention of cerebral infarction<br>434.01 Cerebral thrombosis with cerebral infarction<br>434.1 Cerebral embolism<br>434.10 Cerebral embolism without mention of cerebral infarction<br>434.11 Cerebral embolism with cerebral infarction<br>434.9 Cerebral artery occlusion unspecified<br>434.90 Cerebral artery occlusion, unspecified without mention of cerebral infarction<br>434.91 Cerebral artery occlusion, unspecified with cerebral infarction<br>436 Acute, but ill-defined, cerebrovascular disease                                                                                                                                                                                                                                                                                                                                                                                                                                                                                                                                |
| <b>Transient Ischemic Attack (TIA)</b>      | 435.9 Unspecified transient cerebral ischemia                                                                                                                                                                                                                                                                                                                                                                                                                                                                                                                                                                                                                                                                                                                                                                                                                                                                                                                                                                                                                                                                                                         |
| <b>Carotid Artery Occlusion or Stenosis</b> | 433.1 Occlusion and stenosis of carotid artery                                                                                                                                                                                                                                                                                                                                                                                                                                                                                                                                                                                                                                                                                                                                                                                                                                                                                                                                                                                                                                                                                                        |
| <b>Intracerebral hemorrhage</b>             | 431 Intracerebral hemorrhage                                                                                                                                                                                                                                                                                                                                                                                                                                                                                                                                                                                                                                                                                                                                                                                                                                                                                                                                                                                                                                                                                                                          |
| <b>Atrial Septal Defects</b>                | 745.5 Ostium secundum type atrial septal defect<br>745.5 Anomaly, anomalous (congenital), atrial septa<br>745.5 Anomaly, anomalous (congenital), heart septum<br>745.5 Anomaly, anomalous (congenital), foramen Botalli<br>745.5 Anomaly, anomalous (congenital), foramen ovale<br>745.5 Anomaly, anomalous (congenital), atrial septum<br>745.5 Anomaly, anomalous (congenital), interatrial<br>745.5 Anomaly, anomalous (congenital), cyanosis due to patent foramen botalli<br>745.5 Anomaly, anomalous (congenital), cyanosis due to persistent foramen ovale<br>745.5 Anomaly, anomalous (congenital), Defect, defective atrial septal<br>745.5 Anomaly, anomalous (congenital), Defect, defective atrium secundum<br>745.5 Anomaly, anomalous (congenital), Defect, defective fossa ovalis<br>745.5 Anomaly, anomalous (congenital), Defect, defective interatrial septal<br>745.5 Anomaly, anomalous (congenital), Defect, defective ostium secundum<br>745.5 Anomaly, anomalous (congenital), Defect, defective septal, atrial<br>745.5 Anomaly, anomalous (congenital), Deformity<br>745.5 Anomaly, anomalous (congenital), Imperfect atrium |
| <b>Rheumatic Heart Disease</b>              | 398.90 Rheumatic heart disease, unspecified                                                                                                                                                                                                                                                                                                                                                                                                                                                                                                                                                                                                                                                                                                                                                                                                                                                                                                                                                                                                                                                                                                           |
| <b>Prosthetic Valve</b>                     | V43.3 Presence of prosthetic heart valve                                                                                                                                                                                                                                                                                                                                                                                                                                                                                                                                                                                                                                                                                                                                                                                                                                                                                                                                                                                                                                                                                                              |
| <b>Hyperthyroid Disease</b>                 | 242.9 Thyrotoxicosis without mention of goiter or other causes<br>242.9 Acropachy, thyroid<br>242.9 Apathetic thyroid storm<br>242.9 Crisis, thyroid<br>242.9 Crisis, thyrotoxic<br>242.9 Delirium, delirious, thyroid<br>242.9 Hyperactive thyroid<br>242.9 Hyperthyroidism (latent) (preadult) (recurrent) (without goiter)<br>242.9 Instability, thyroid, paroxysmal<br>242.9 Leopold-Levi's syndrome (paroxysmal thyroid instability)<br>242.9 Myxedema<br>242.9 Overactive thyroid<br>242.9 Storm, thyroid<br>242.9 Thyrotoxicosis<br>242.9 Toxic, thyroid                                                                                                                                                                                                                                                                                                                                                                                                                                                                                                                                                                                       |
| <b>Atrial Fibrillation</b>                  | 427.31 Atrial (established) (paroxysmal) Fibrillation<br>427.31 Auricular (atrial) (established) Fibrillation<br>427.31 Synonyms:<br>Atrial fibrillation,<br>atrial fibrillation with rapid ventricular response,<br>atrial fibrillation (chronic)                                                                                                                                                                                                                                                                                                                                                                                                                                                                                                                                                                                                                                                                                                                                                                                                                                                                                                    |

atrial fibrillation (paroxysmal)  
atrial fibrillation (permanent)  
chronic atrial fibrillation  
paroxysmal atrial fibrillation  
permanent atrial fibrillation

427.32 Atrial or auricular flutter

427.32 Synonyms:

Atrial flutter  
Atrial flutter (chronic)  
Atrial flutter (paroxysmal)  
Chronic atrial flutter  
Paroxysmal atrial flutter

## Hypertension

401 Essential Hypertension  
401.0 Malignant essential hypertension  
401.1 Benign essential hypertension  
401.9 Unspecified essential hypertension

## Diabetes

250 Diabetes mellitus  
250.0 Diabetes mellitus without mention of complication  
250.00 Diabetes mellitus without mention of complication, type II or unspecified type, not stated as uncontrolled  
250.01 Diabetes mellitus without mention of complication, type I [juvenile type], not stated as uncontrolled  
250.02 Diabetes mellitus without mention of complication, type II or unspecified type, uncontrolled  
250.03 Diabetes mellitus without mention of complication, type I [juvenile type], uncontrolled  
250.1 Diabetes with ketoacidosis  
250.10 Diabetes with ketoacidosis, type II or unspecified type, not stated as uncontrolled  
250.11 Diabetes with ketoacidosis, type I [juvenile type], not stated as uncontrolled  
250.12 Diabetes with ketoacidosis, type II or unspecified type, uncontrolled  
250.13 Diabetes with ketoacidosis, type I [juvenile type], uncontrolled  
250.2 Diabetes with hyperosmolarity  
250.20 Diabetes with hyperosmolarity, type II or unspecified type, not stated as uncontrolled  
250.21 Diabetes with hyperosmolarity, type I [juvenile type], not stated as uncontrolled  
250.22 Diabetes with hyperosmolarity, type II or unspecified type, uncontrolled  
250.23 Diabetes with hyperosmolarity, type I [juvenile type], uncontrolled  
250.3 Diabetes with other coma  
250.30 Diabetes with other coma, type II or unspecified type, not stated as uncontrolled  
250.31 Diabetes with other coma, type I [juvenile type], not stated as uncontrolled  
250.32 Diabetes with other coma, type II or unspecified type, uncontrolled  
250.33 Diabetes with other coma, type I [juvenile type], uncontrolled  
250.4 Diabetes with renal manifestations  
250.40 Diabetes with renal manifestations, type II or unspecified type, not stated as uncontrolled  
250.41 Diabetes with renal manifestations, type I [juvenile type], not stated as uncontrolled  
250.42 Diabetes with renal manifestations, type II or unspecified type, uncontrolled  
250.43 Diabetes with renal manifestations, type I [juvenile type], uncontrolled  
250.5 Diabetes with ophthalmic manifestations  
250.50 Diabetes with ophthalmic manifestations, type II or unspecified type, not stated as uncontrolled  
250.51 Diabetes with ophthalmic manifestations, type I [juvenile type], not stated as uncontrolled  
250.52 Diabetes with ophthalmic manifestations, type II or unspecified type, uncontrolled  
250.53 Diabetes with ophthalmic manifestations, type I [juvenile type], uncontrolled  
250.6 Diabetes with neurological manifestations  
250.60 Diabetes with neurological manifestations, type II or unspecified type, not stated as uncontrolled  
250.61 Diabetes with neurological manifestations, type I [juvenile type], not stated as uncontrolled  
250.62 Diabetes with neurological manifestations, type II or unspecified type, uncontrolled  
250.63 Diabetes with neurological manifestations, type I [juvenile type], uncontrolled  
250.7 Diabetes with peripheral circulatory disorders

250.70 Diabetes with peripheral circulatory disorders, type II or unspecified type, not stated as uncontrolled  
250.71 Diabetes with peripheral circulatory disorders, type I [juvenile type], not stated as uncontrolled  
250.72 Diabetes with peripheral circulatory disorders, type II or unspecified type, uncontrolled  
250.73 Diabetes with peripheral circulatory disorders, type I [juvenile type], uncontrolled  
250.8 Diabetes with other specified manifestations  
250.80 Diabetes with other specified manifestations, type II or unspecified type, not stated as uncontrolled  
250.81 Diabetes with other specified manifestations, type I [juvenile type], not stated as uncontrolled  
250.82 Diabetes with other specified manifestations, type II or unspecified type, uncontrolled  
250.83 Diabetes with other specified manifestations, type I [juvenile type], uncontrolled  
250.9 Diabetes with unspecified complication  
250.90 Diabetes with unspecified complication, type II or unspecified type, not stated as uncontrolled  
250.91 Diabetes with unspecified complication, type I [juvenile type], not stated as uncontrolled  
250.92 Diabetes with unspecified complication, type II or unspecified type, uncontrolled  
250.93 Diabetes with unspecified complication, type I [juvenile type], uncontrolled

**Obesity**

278.00 Obesity  
287.01 Morbid Obesity

**Congestive Heart Failure**

428 Heart failure  
428.0 Congestive heart failure, unspecified  
428.1 Left heart failure  
428.2 Systolic heart failure  
428.20 Systolic heart failure, unspecified  
428.21 Acute systolic heart failure  
428.22 Chronic systolic heart failure  
428.23 Acute on chronic systolic heart failure  
428.3 Diastolic heart failure  
428.30 Diastolic heart failure, unspecified  
428.31 Acute diastolic heart failure  
428.32 Chronic diastolic heart failure  
428.33 Acute on chronic diastolic heart failure  
428.4 Combined systolic and diastolic heart failure  
428.40 Combined systolic and diastolic heart failure, unspecified  
428.41 Acute combined systolic and diastolic heart failure  
428.42 Chronic combined systolic and diastolic heart failure  
428.43 Acute on chronic combined systolic and diastolic heart failure  
428.9 Heart failure, unspecified

**Coronary Artery Disease**

414 Other forms of chronic ischemic heart disease  
414.0 Coronary atherosclerosis  
414.00 Coronary atherosclerosis of unspecified type of vessel, native or graft  
414.01 Coronary atherosclerosis of native coronary artery  
414.02 Coronary atherosclerosis of autologous vein bypass graft  
414.03 Coronary atherosclerosis of nonautologous biological bypass graft  
414.04 Coronary atherosclerosis of artery bypass graft  
414.05 Coronary atherosclerosis of unspecified bypass graft  
414.06 Coronary atherosclerosis of native coronary artery of transplanted heart  
414.07 Coronary atherosclerosis of bypass graft (artery) (vein) of transplanted heart  
414.1 Aneurysm and dissection of heart  
414.10 Aneurysm of heart (wall)  
414.11 Aneurysm of coronary vessels  
414.12 Dissection of coronary artery  
414.19 Other aneurysm of heart  
414.2 Chronic total occlusion of coronary artery  
414.3 Coronary atherosclerosis due to lipid rich plaque  
414.4 Coronary atherosclerosis due to calcified coronary lesion  
414.8 Other specified forms of chronic ischemic heart disease  
414.9 Chronic ischemic heart disease, unspecified

**Peripheral Vascular Disease**

443 Other peripheral vascular disease

443.0 Raynaud's syndrome  
443.1 Thromboangiitis obliterans [Buerger's disease]  
443.2 Other arterial dissection  
443.21 Dissection of carotid artery  
443.22 Dissection of iliac artery  
443.23 Dissection of renal artery  
443.24 Dissection of vertebral artery  
443.29 Dissection of other artery  
443.8 Other specified peripheral vascular diseases  
443.81 Peripheral angiopathy in diseases classified elsewhere  
443.82 Erythromelalgia  
443.89 Other specified peripheral vascular diseases  
443.9 Peripheral vascular disease, unspecified

**Chronic Kidney Disease  
(Stage III, IV, V)**

585.3 Chronic Kidney Disease Stage III  
585.4 Chronic Kidney Disease Stage IV  
585.5 Chronic Kidney Disease Stage V

**Aortic Valve Disease**

424.1 Aortic Valve Disorders  
424.1 Arteriosclerosis, arteriosclerotic heart, valve, aortic  
424.1 Atheroma, atheromatous, aorta, aortic, valve  
424.1 Deformity, aortic, cusp or valve, acquired, aortic  
424.1 Degeneration, degenerative, aorta, aortic valve  
424.1 Disease, diseased aortic (heart) (valve)  
424.1 Endocarditis, aortic  
424.1 Incompetency, incompetence, incompetent, annular, aortic (valve)  
424.1 Insufficiency, insufficient, aortic (valve)  
424.1 Insufficiency, insufficient, aortic (valve) with stenosis or obstruction  
424.1 Murmur (cardiac) (heart), aortic (valve)  
424.1 Murmur (cardiac) (heart), Flint  
424.1 Pulse, water-hammer  
424.1 Regurgitation, aortic (valve) 424.1  
424.1 Sclerosis, sclerotic, annularis fibrosis, aortic  
424.1 Stenosis, aortic (valve)  
424.1 Synonyms:  
Aortic incompetence, non-rheumatic  
Aortic stenosis, non-rheumatic  
Aortic valve disease  
Aortic valve disorder  
Aortic valve disorder in childbirth  
Aortic valve disorder postpartum  
Aortic valve regurgitation  
Aortic valve regurgitation, nonrheumatic  
Aortic valve sclerosis  
Aortic valve stenosis  
Aortic valve stenosis  
Aortic valve stenosis, critical  
Aortic valve stenosis, nonrheumatic  
Critical aortic stenosis (narrowing)  
Critical aortic valve stenosis  
Critical stenosis of aortic valve  
Nonrheumatic aortic valve regurgitation  
Nonrheumatic aortic valve stenosis  
Postpartum (after childbirth) aortic valve disorder  
Postpartum aortic valve disorder

**Mitral Valve Disease**

424.0 Mitral Valve Disorders  
424.0 Aneurysm mitral (heart)(valve)  
424.0 Arteriosclerosis, heart, valve, mitral  
424.0 Atheroma, atheromatous, mitral (valve)  
424.0 Ballooning posterior leaflet syndrome  
424.0 Barlow's syndrome  
424.0 Endocarditis, mitral  
424.0 Floppy valve syndrome (mitral)  
424.0 Incompetency, incompetence, incompetent, mitral (valve)

424.0 Insufficiency, insufficient, mitral (valve)  
424.0 Prolapse, prolapsed, mitral valve  
424.0 Sclerosis, sclerotic, mitral  
424.0 Stricture, mitral, unspecified cause, except rheumatic  
424.0 Syndrome, ballooning posterior leaflet  
424.0 Syndrome, Barlow's  
424.0 Syndrome, mitral valve prolapse  
424.0 Synonyms:  
Mitral valve annular calcification  
Mitral valve annular calcification, nonrheumatic  
Mitral valve disorder  
Mitral valve disorder in childbirth  
Mitral valve disorder postpartum  
Mitral valve prolapse  
Mitral valve prolapse, nonrheumatic  
Mitral valve regurgitation  
Mitral valve regurgitation, nonrheumatic  
Mitral valve stenosis  
Mitral valve stenosis, nonrheumatic  
Mitral valve prolapse  
Non-rheumatic mitral regurgitation  
Nonrheumatic mitral valve prolapse  
Non-rheumatic mitral valve prolapse  
Nonrheumatic mitral valve regurgitation  
Nonrheumatic mitral valve stenosis  
Non-rheumatic mitral valve stenosis  
Postpartum (after childbirth) mitral valve disorder  
Postpartum mitral valve disorder

#### **Tricuspid Valve Disease**

424.2 Tricuspid valve disorders, specified as nonrheumatic  
424.2 Arteriosclerosis, arteriosclerotic, heart, valve, tricuspid  
424.2 Atheroma, atheromatous, tricuspid (heart) (valve)  
424.2 Endocarditis, tricuspid, arteriosclerotic  
424.2 Stenosis, tricuspid, nonrheumatic  
424.2 Stricture, tricuspid, nonrheumatic  
424.2 Synonyms:  
Nonrheumatic tricuspid valve disease  
Nonrheumatic tricuspid valve regurgitation  
Nonrheumatic tricuspid valve stenosis  
Tricuspid incompetence, non-rheumatic  
Tricuspid stenosis, non-rheumatic  
Tricuspid valve disorder, nonrheumatic  
Tricuspid valve disorders, non-rheumatic  
Tricuspid valve regurgitation  
Tricuspid valve regurgitation, nonrheumatic  
Tricuspid valve stenosis  
Tricuspid valve stenosis, nonrheumatic

#### **Pulmonary Valve Disease**

424.3 Pulmonary Valve Disorders  
424.3 Aneurysm, pulmonary, valve (heart)  
424.3 Arteriosclerosis, arteriosclerotic, heart, valve, pulmonary  
424.3 Atheroma, atheromatous, pulmonary valve (heart)  
424.3 Degeneration, degenerative, pulmonary valve  
424.3 Disease, diseased, valve  
424.3 Endocarditis, pulmonary (valve)  
424.3 Graham Steell's murmur  
424.3 Incompetency, incompetence, incompetent, annular, pulmonary valve (heart)  
424.3 Incompetency, incompetence, pulmonary valve (heart)  
424.3 Insufficiency, insufficient, pulmonary (acute), valve  
424.3 Lesion(s), pulmonary, valve  
424.3 Obstruction, obstructed, obstructive, pulmonary valve (heart)  
424.3 Regurgitation, pulmonary (heart) (valve)  
424.3 Rupture, ruptured, valve (heart)  
424.3 Sclerosis, sclerotic, pulmonary, valve (heart)

424.3 Stenosis, pulmonary, valve

424.3 Stricture, pulmonary, pulmonic, valve

424.3 Synonyms:

Nonrheumatic pulmonary valve disease

Non-rheumatic pulmonary valve disorder

Nonrheumatic pulmonary valve regurgitation

Nonrheumatic pulmonary valve stenosis

Pulmonary incompetence, non-rheumatic

Pulmonary stenosis, non-rheumatic

Pulmonary valve disease

Pulmonary valve disease, nonrheumatic

Pulmonary valve disorder

Pulmonary valve regurgitation

Pulmonary valve regurgitation, nonrheumatic

Pulmonary valve stenosis

Pulmonary valve stenosis, nonrheumatic

Pulmonic valve regurgitation

Pulmonic valve stenosis

Pulmonic valve stenosis (narrowing)
